# Supplementary material
Source: publisher figshare collection journal article supplement (https://acs.figshare.com/ndownloader/files/7440739)
Supplement: Supplementary file 1 [file 7440739]

Supporting information

**Reactive Oxygen Species and Glutathione Dual  
Redox-Responsive Supramolecular Assemblies with  
Controllable Release Capability**

Yang Kang,<sup>†</sup> Xin Ju,<sup>‡</sup> Li-Sheng Ding,<sup>†</sup> Sheng Zhang\*<sup>‡</sup> and Bang-Jing Li\*<sup>†</sup>

<sup>†</sup> Key Laboratory of Mountain Ecological Restoration and Bioresource Utilization, Chengdu Institute of Biology, Chinese Academy of Sciences, Chengdu 610041, China, Tel: +86-28-82890646. Fax: (+86)28-82890646. E-mail: libj@cib.ac.cn (B. Li);

<sup>‡</sup> State Key Laboratory of Polymer Materials Engineering, Polymer Research Institute of Sichuan University, Sichuan University, Chengdu 610065, China, Tel, Fax: +86-28-85400266. E-mail: zslbj@163.com (S. Zhang).

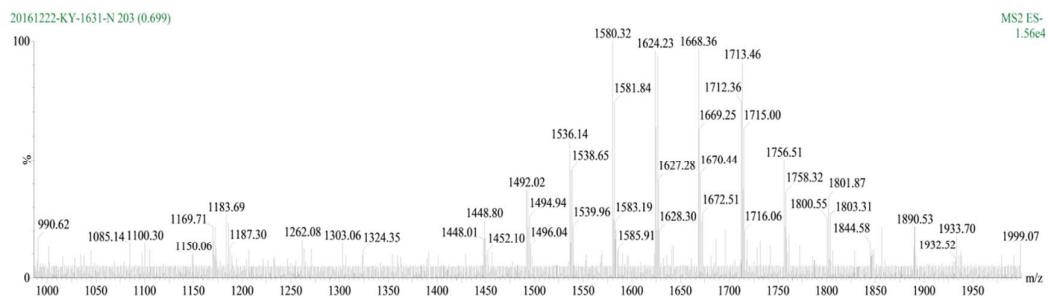

**Figure S1** ESI mass spectrum of mPEG- $\beta$ -CD.

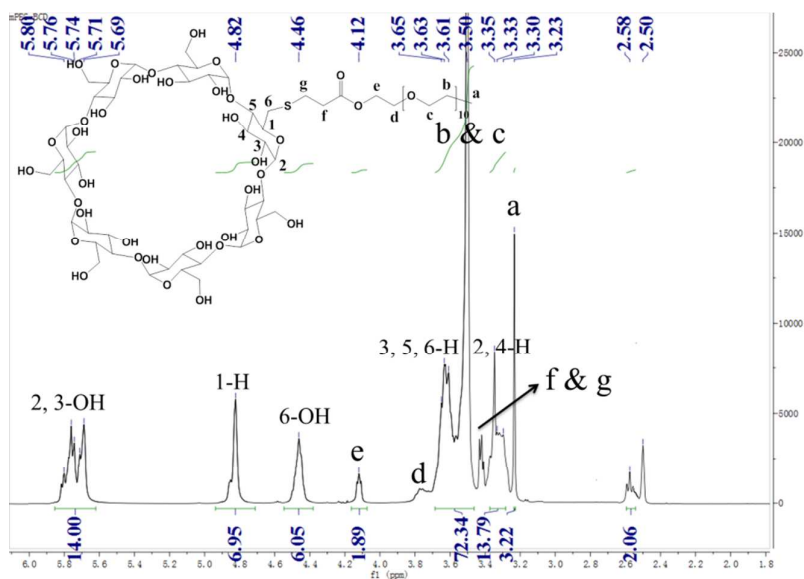

**Figure S2**  $^1\text{H}$  NMR spectrum of mPEG- $\beta$ -CD (solvent: DMSO- $\text{d}_6$ ).

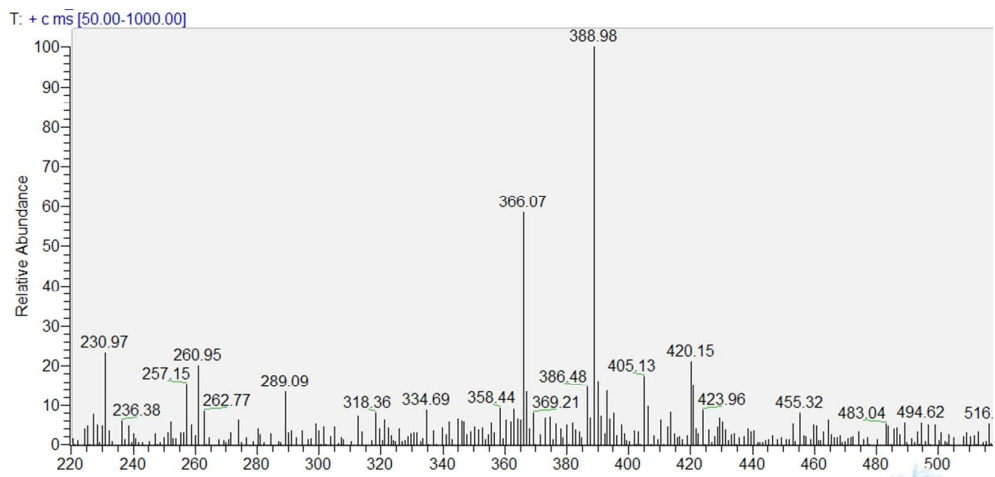

**Figure S3** ESI mass spectrum of HSEFc.

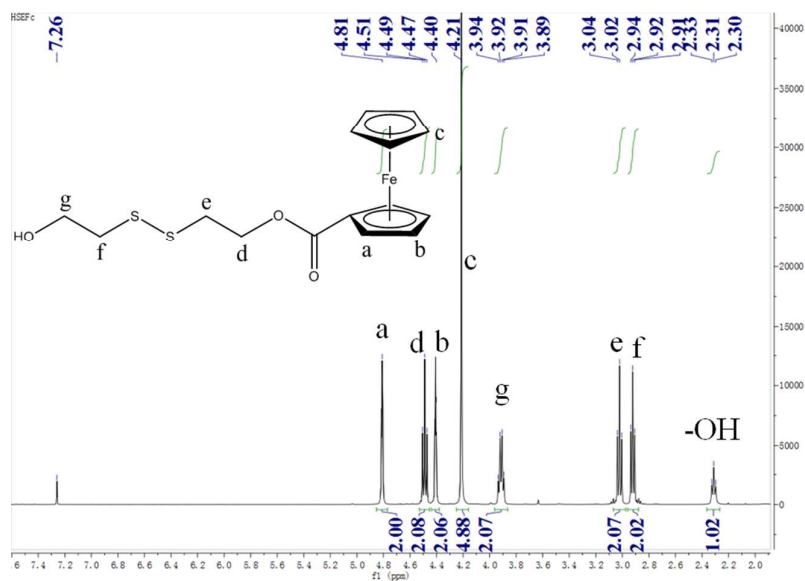

**Figure S4**  $^1\text{H}$  NMR spectrum of HSEFc (solvent:  $\text{CDCl}_3$ ).

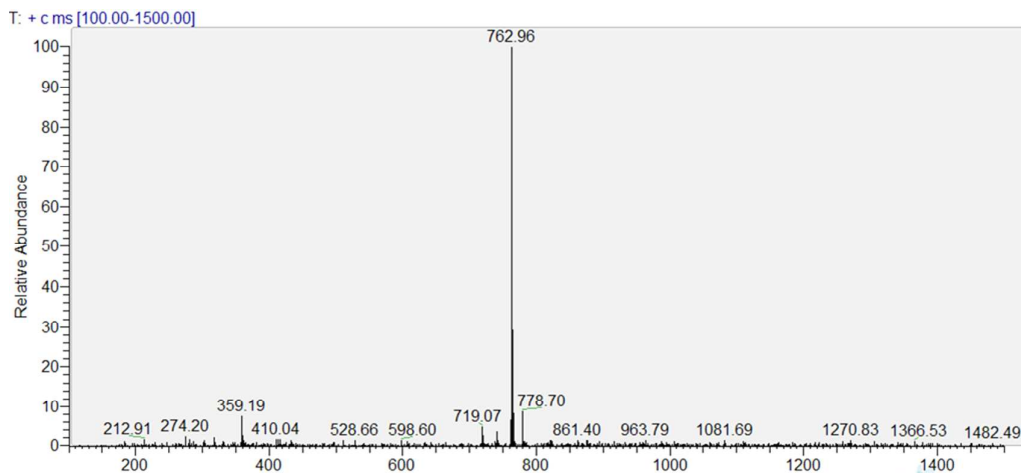

**Figure S5** ESI mass spectrum of Fc-CPT.

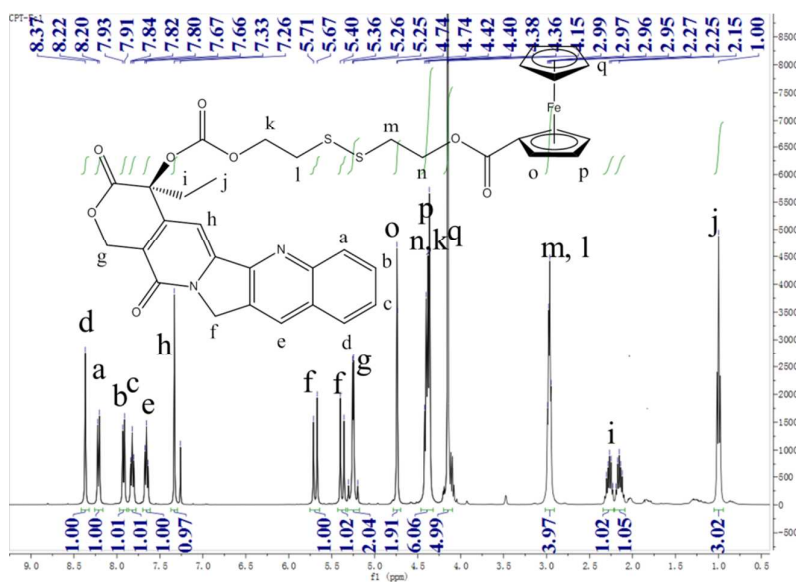

**Figure S6**  $^1\text{H}$  NMR spectrum of Fc-CPT (solvent:  $\text{CDCl}_3$ ).

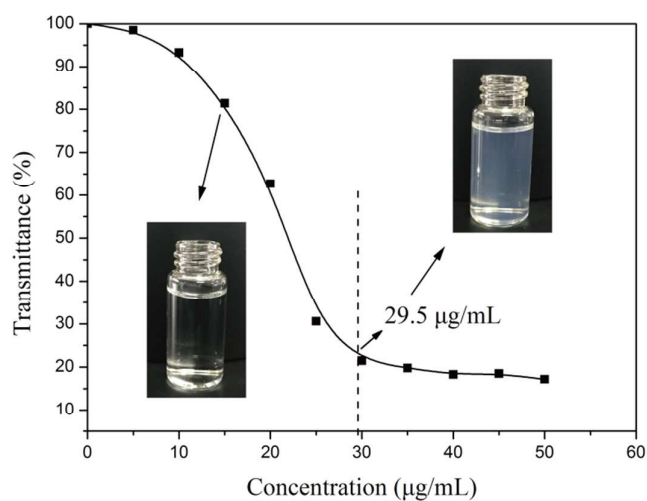

**Figure S7** Determination of CMC for the micelles of mPEG- $\beta$ -CD/Fc-CPT supramolecular polymer by turbidity tests at 25 °C.

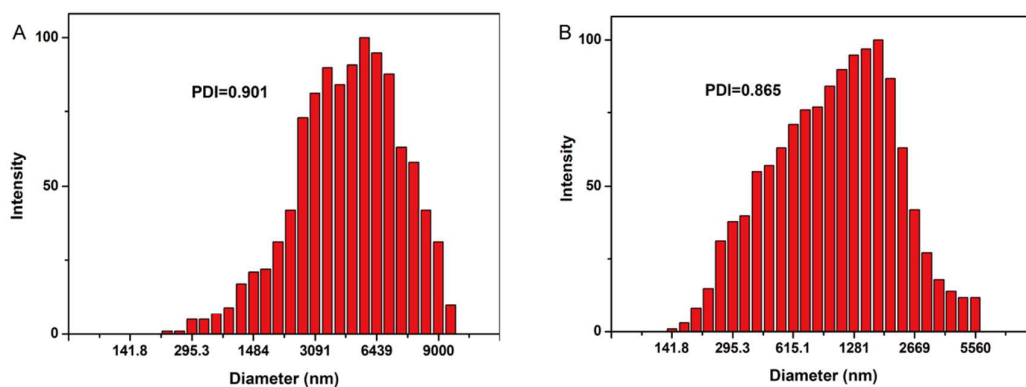

**Figure S8** (A) The hydrodynamic diameter ( $D_h$ ) distribution of the micelles detected by DLS 10 h after the addition of GSH; (B) The hydrodynamic diameter ( $D_h$ ) distribution of the micelles detected by DLS 10 h after the addition of  $H_2O_2$ .
